# Supplementary figures and images for: Metabolic reprogramming induced by ketone bodies diminishes pancreatic cancer cachexia
Source: Springer Nature journal article supplement (doi:10.1186/2049-3002-2-18), 2014-09-01

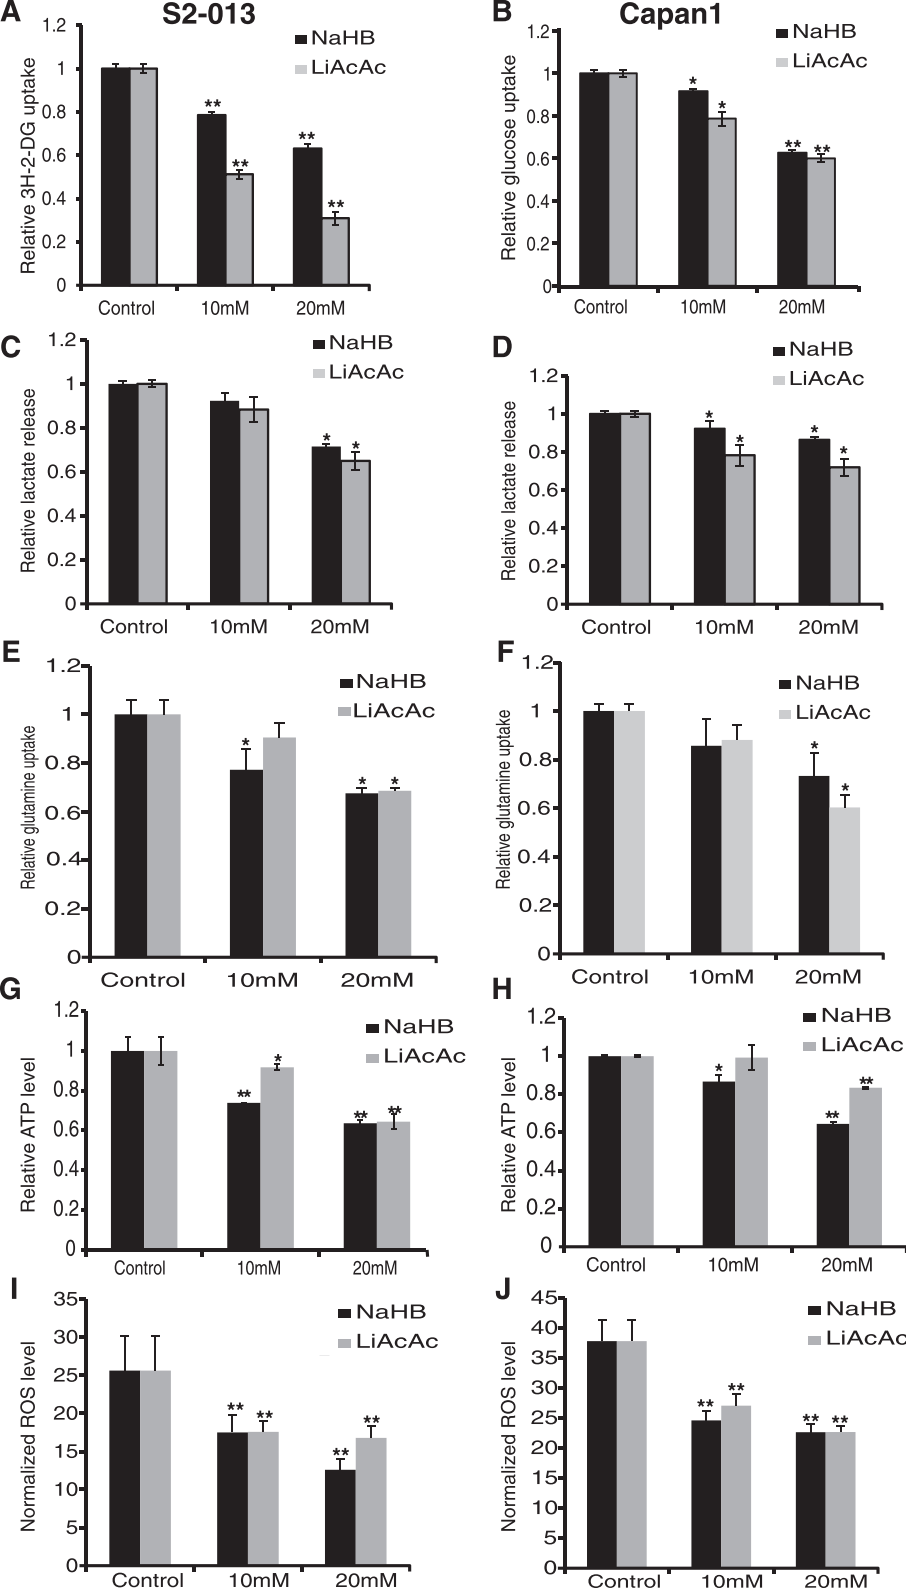

Supplement: 40170_2014_132_MOESM13_ESM.pdf [file 40170_2014_132_MOESM13_ESM.pdf]
